# Supplementary material
Source: PubMed Central journal article supplement (PMC4449817)

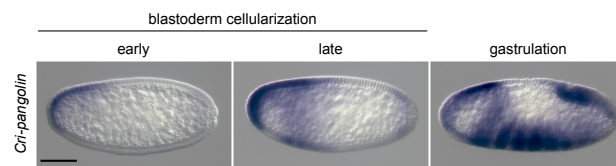

Supplement: NIHMS690310-supplement-Fig__S5.pdf [file NIHMS690310-supplement-Fig__S5.pdf]

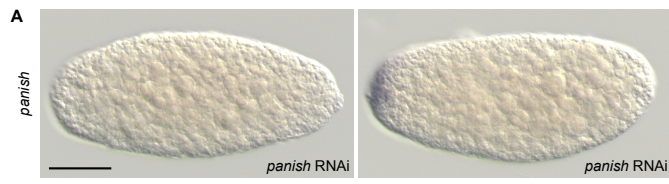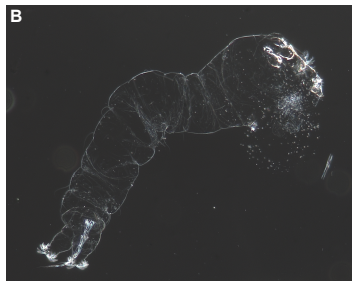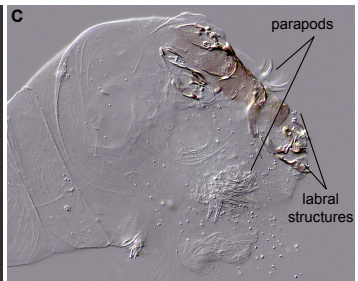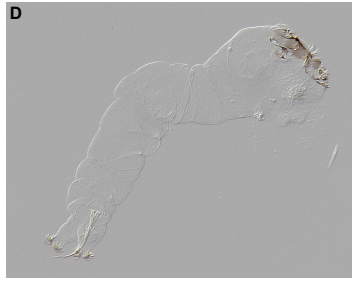

Supplement: NIHMS690310-supplement-Fig__S6.pdf [file NIHMS690310-supplement-Fig__S6.pdf]

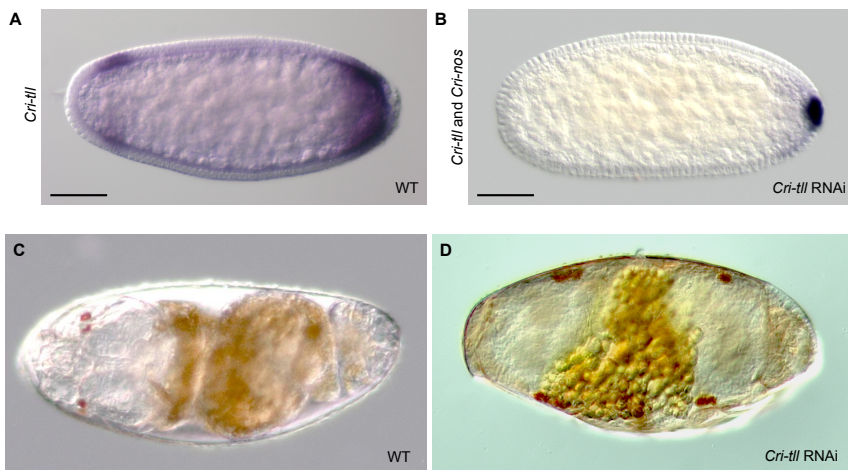

Supplement: NIHMS690310-supplement-Fig__S8.pdf [file NIHMS690310-supplement-Fig__S8.pdf]
